# Supplementary material for: Transcriptome Analysis of Arabidopsis thaliana Plants Treated with a New Compound Natolen128, Enhancing Salt Stress Tolerance
Source: MDPI journal article supplement (doi:10.3390/plants10050978), 2021-05-14
Supplement: s1 [file s1]

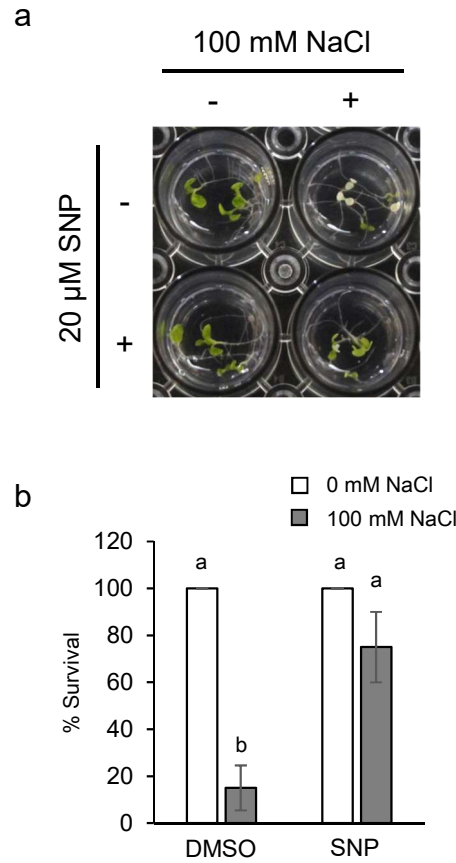

Supplemental Figure 1 SNP enhances high-salinity stress tolerance in *Arabidopsis thaliana*. (a) Morphology of seedlings treated with 20  $\mu$ M SNP, with or without subsequent treatment of 100 mM NaCl for 4 days. DMSO was used as negative controls. The inside diameter of each well is 15.4 mm. (b) Survival rate under high-salinity conditions in the presence or absence of 20  $\mu$ M SNP. The survival rate of 15 plants was calculated 4 days after NaCl treatment. These experiments were conducted using three biological replicates. Error bars represent the mean  $\pm$  standard error (SE). Statistical significance was determined by ANOVA, followed by post-hoc Tukey's tests. Means that differed significantly ( $p < 0.05$ ) are indicated by different letters.
